# Supplementary material
Source: publisher site journal article supplement (https://www.dovepress.com/article/397541)
Supplement: Supplementary file 1 [file get_supplementary_file.php]

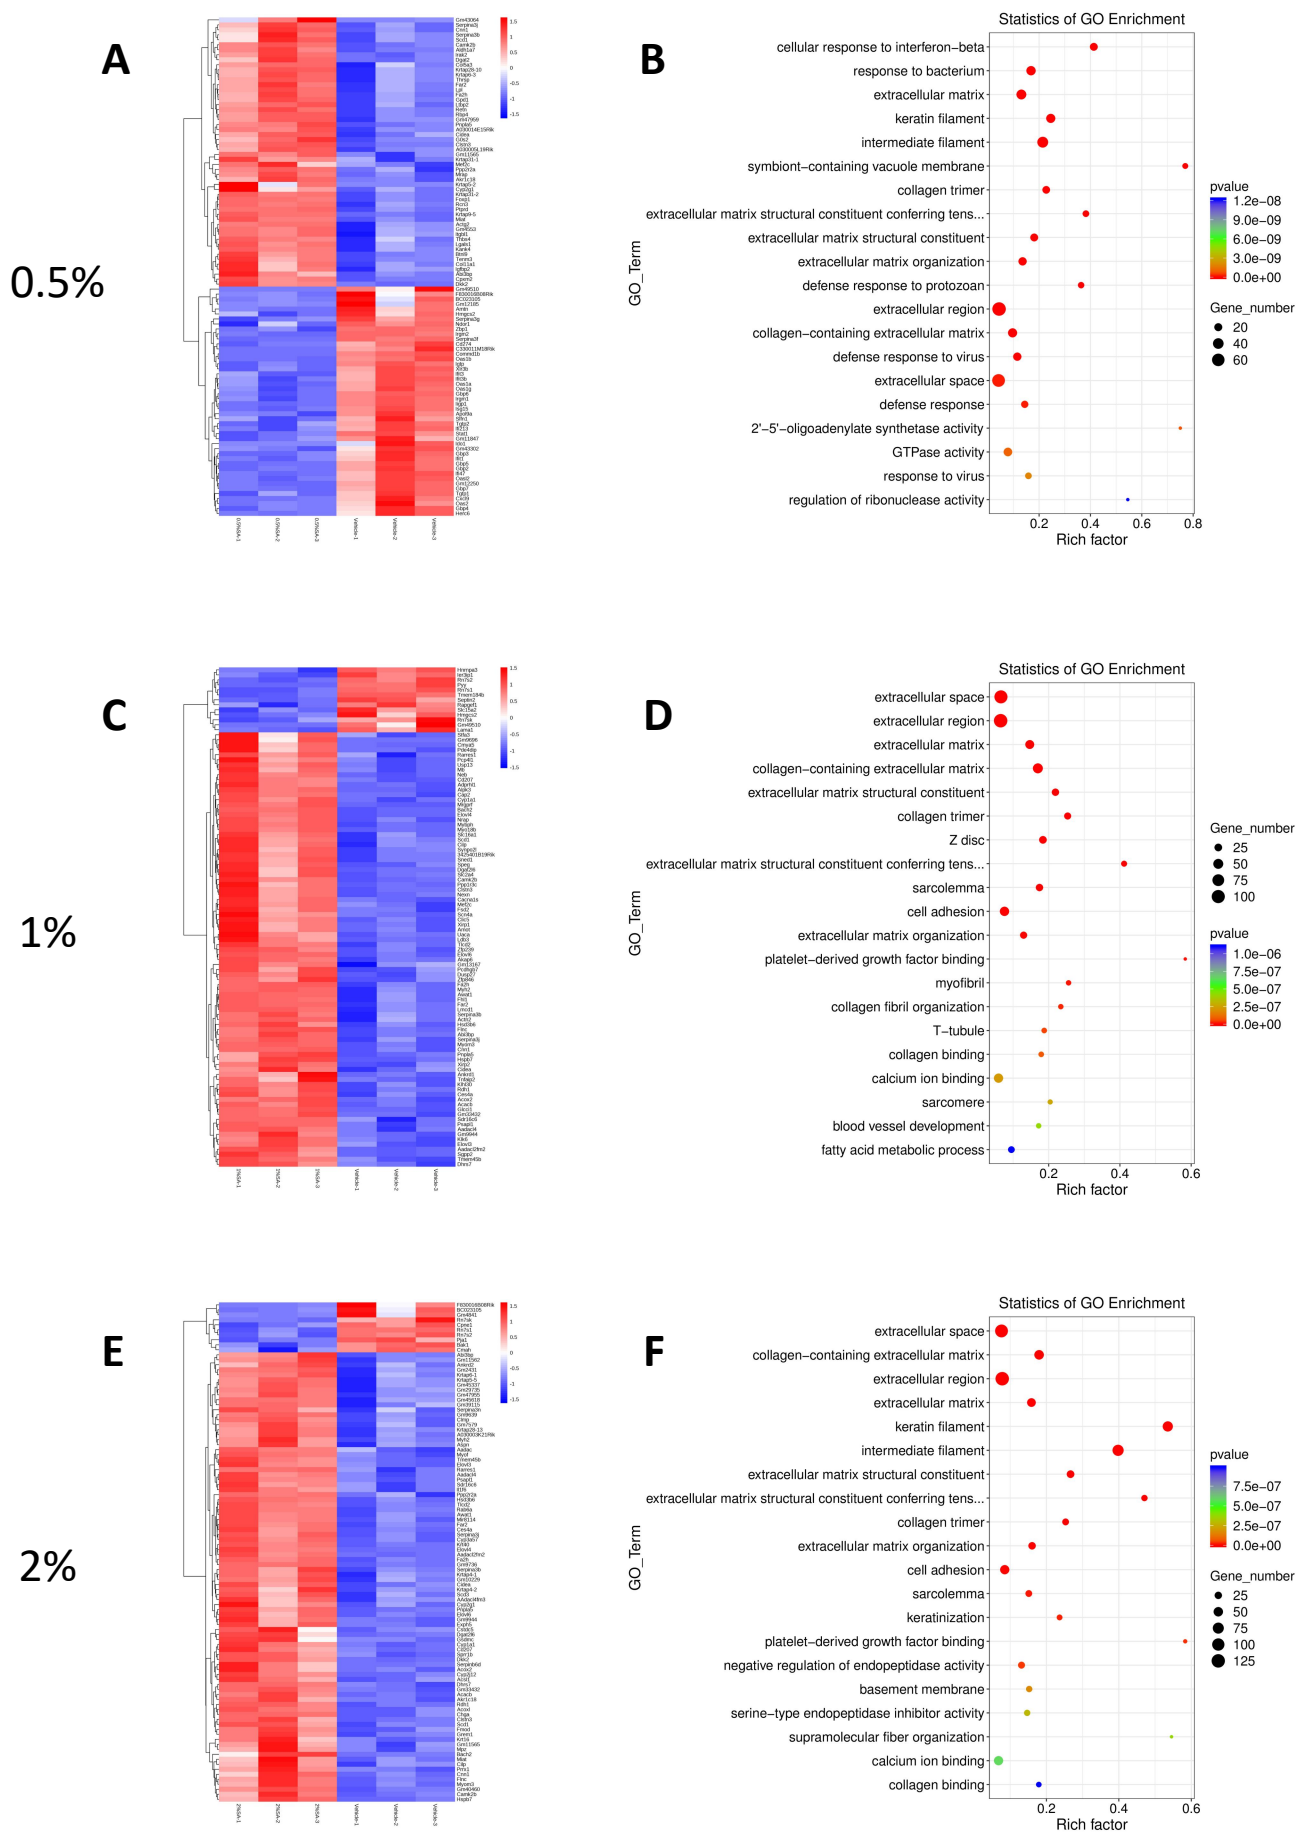

Supplementary Figure 1|SA regulates the gene expression profiles of extracellular region on day 14

(A)Heatmap of differentially expressed genes in 0.5%SA group and control group.

(B)Scatter plot for GO analysis based on RNAseq data from mice treated with 0.5%SA or gel vehicle for 14 days.

(C)Heatmap of differentially expressed genes in 1%SA group and control group.

(D)Scatter plot for GO analysis based on RNAseq data from mice treated with 1%SA or gel vehicle for 14 days.

(E)Heatmap of differentially expressed genes in 2%SA group and control group.

(F)Scatter plot for GO analysis based on RNAseq data from mice treated with 2%SA or gel vehicle for 14 days.

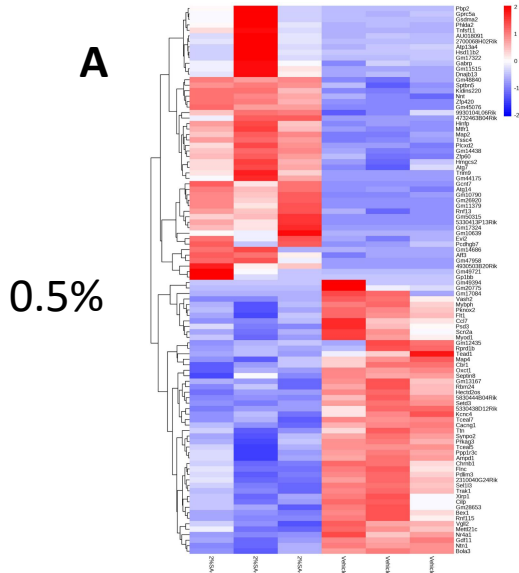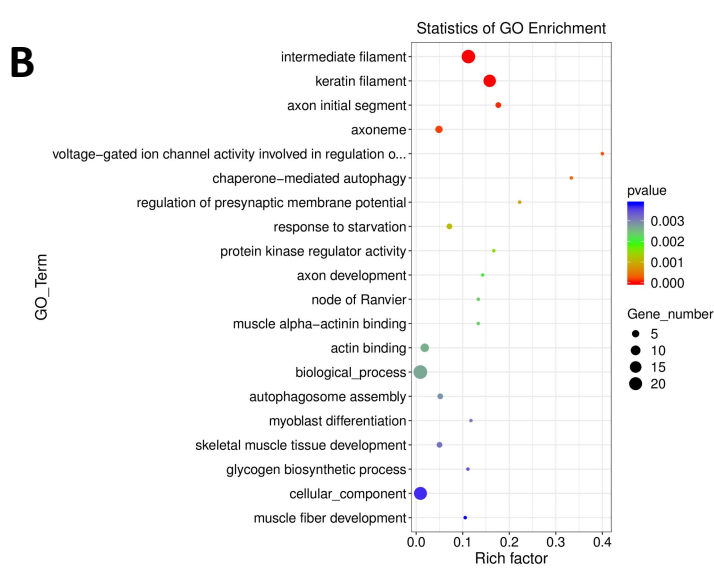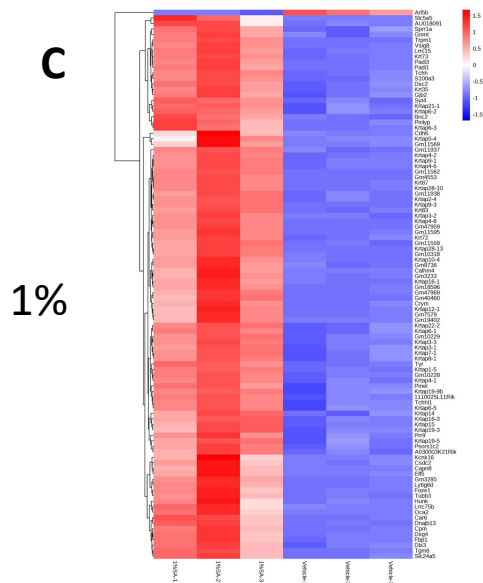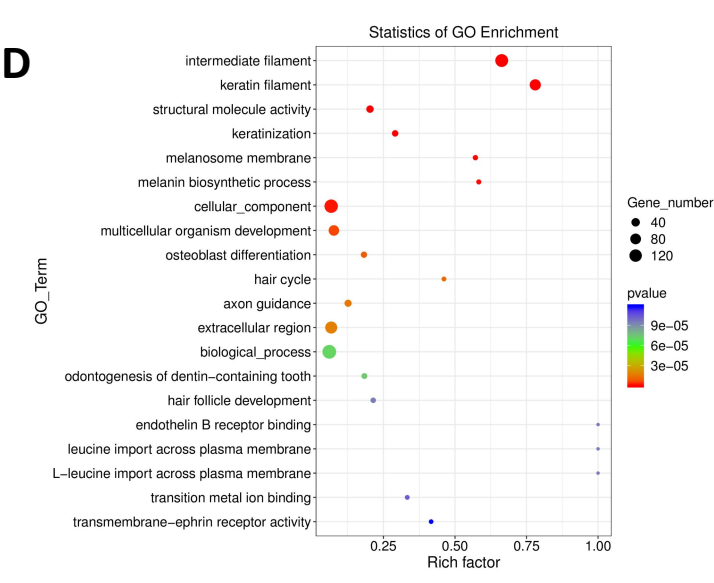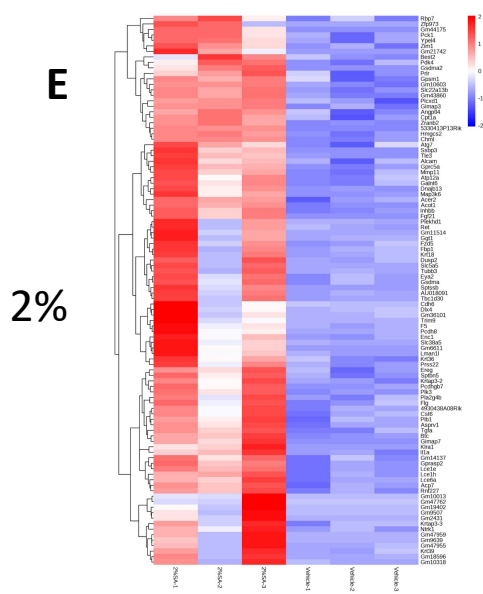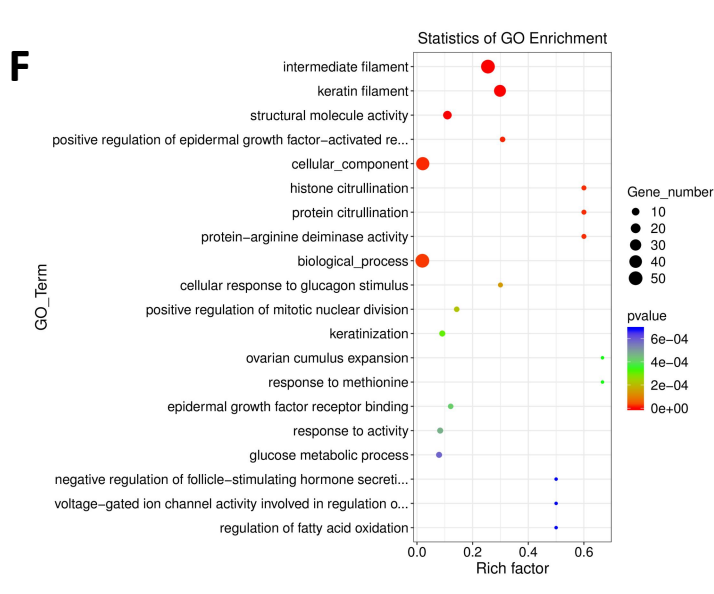

Supplementary Figure 2 | SA regulates genes associated with keratinization, lipid metabolic process on day 28  
 (A) Heatmap of differentially expressed genes in 0.5%SA group and control group.  
 (B) Scatter plot for GO analysis based on RNAseq data from mice treated with 0.5%SA or gel vehicle for 28 days.  
 (C) Heatmap of differentially expressed genes in 1%SA group and control group.  
 (D) Scatter plot for GO analysis based on RNAseq data from mice treated with 1%SA or gel vehicle for 28 days.  
 (E) Heatmap of differentially expressed genes in 2%SA group and control group.  
 (F) Scatter plot for GO analysis based on RNAseq data from mice treated with 2%SA or gel vehicle for 28 days.

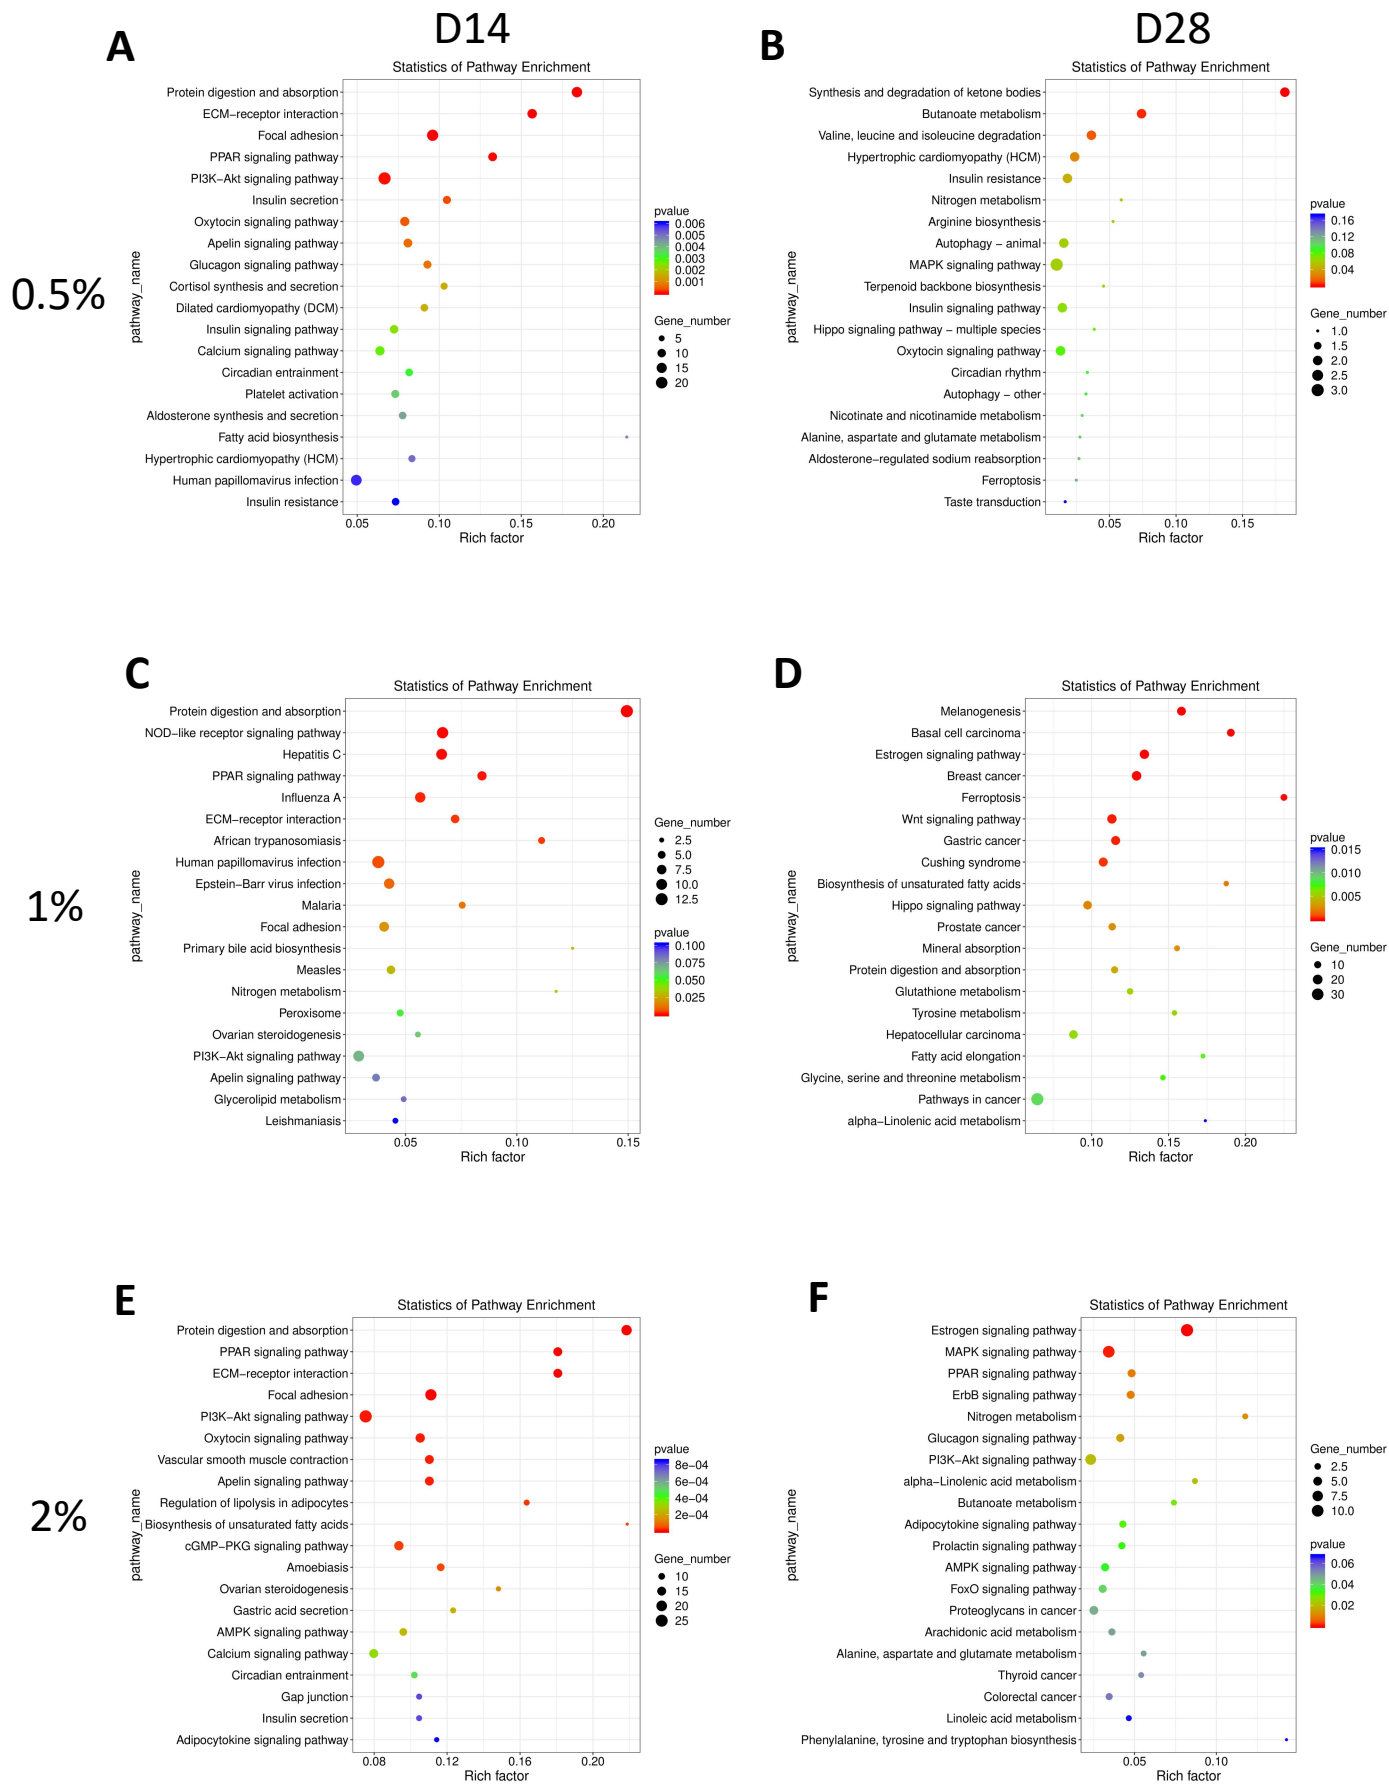

Supplementary Figure 3 | KEGG enrichment of dorsal skin

(A) Scatter plot for KEGG analysis based on RNAseq data from mice treated with 0.5%SA or gel vehicle for 14 days.

(B) Scatter plot for KEGG analysis based on RNAseq data from mice treated with 0.5%SA or gel vehicle for 28 days.

(C) Scatter plot for KEGG analysis based on RNAseq data from mice treated with 1%SA or gel vehicle for 14 days.

(D) Scatter plot for KEGG analysis based on RNAseq data from mice treated with 1%SA or gel vehicle for 28 days.

(E) Scatter plot for KEGG analysis based on RNAseq data from mice treated with 2%SA or gel vehicle for 14 days.

(F) Scatter plot for KEGG analysis based on RNAseq data from mice treated with 2%SA or gel vehicle for 28 days.
